# Supplementary material
Source: Springer Nature journal article supplement (https://www.springermedizin.de/resource/supplementary/12916_2010_360_MOESM1_ESM.pdf/9599726)

A

↓ Blood pressure → passive stretch

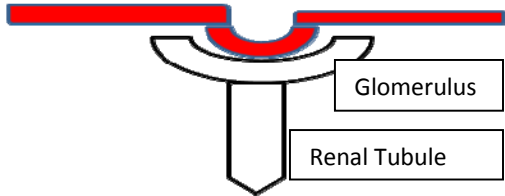

B

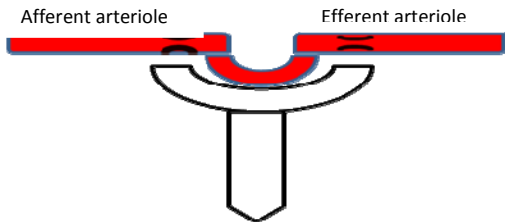

Autoregulation via afferent and efferent arteriole constriction

C

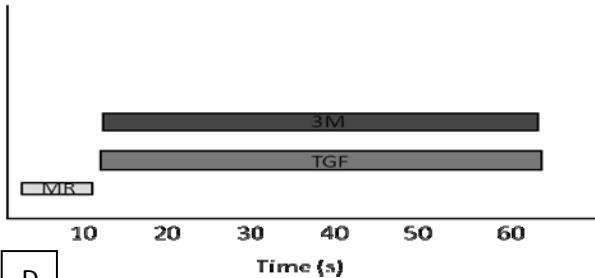

D

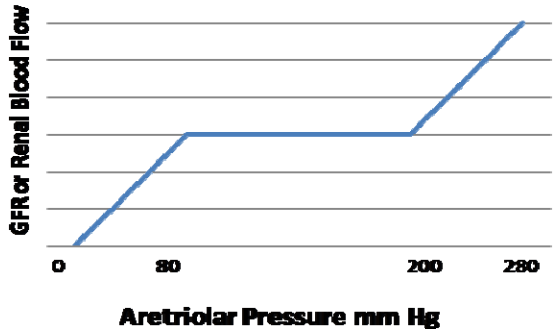

Supplement: MOESM1 [file 9599726]
